# Supplementary material for: Geographic variation in the intended choice of adjuvant treatments for women diagnosed with screen-detected breast cancer in Queensland
Source: BMC Public Health. 2015 Dec 2;15:1204. doi: 10.1186/s12889-015-2527-2 (PMC4668608; doi:10.1186/s12889-015-2527-2)
Supplement: Additional file 2 — Supplementary Figures. (ZIP 28672 kb) [file 12889_2015_2527_MOESM2_ESM.zip]

Archive with 2 entries (2 files):
- 12889_2015_MOSEM1_ESM/1403555084156788_add2.pdf
- 12889_2015_MOSEM1_ESM/1403555084156788_add3.pdf
