# Supplementary material for: Geographic variation in the intended choice of adjuvant treatments for women diagnosed with screen-detected breast cancer in Queensland
Source: Springer Nature journal article supplement (doi:10.1186/s12889-015-2527-2), 2015-12-01
Supplement: MOESM1 [file 9750894]

Table 1: Estimated posterior correlation of the treatment-specific unstructured random effects between adjuvant therapies.

| Median posterior correlation [95% CrI <sup>a</sup> ] | Radiotherapy        | Chemotherapy        | Hormonal Therapy     |
|------------------------------------------------------|---------------------|---------------------|----------------------|
| Radiotherapy                                         | 15.82 [9.09, 25.51] | —                   | —                    |
| Chemotherapy                                         | -0.78 [-6.62, 4.88] | 13.49 [7.92, 22.86] | —                    |
| Hormonal therapy                                     | -2.41 [-9.10, 3.62] | 0.69 [-5.03, 6.54]  | 18.51 [11.95, 29.81] |

<sup>a</sup>Abbreviations: CrI=Credible interval.

Table 2: Model Comparison.

| Model                                                                         | pD <sup>a</sup> | DIC <sup>b</sup> |
|-------------------------------------------------------------------------------|-----------------|------------------|
| (baseline) A0                                                                 | 417             | 18364            |
| (spatially unstructured random effect 'u' with independent Gaussian prior) A1 | 434             | 18380            |
| (second shared component for radiotherapy and chemotherapy) A2                | 422             | 18370            |
| (second shared component for radiotherapy and hormonal therapy) A3            | 413             | 18363            |
| (second shared component for chemotherapy and hormonal therapy) A4            | 422             | 18371            |
| (without spatially unstructured random effect 'u') A5                         | 294             | 18254            |
| (without spatially unstructured random effect 's') A6                         | 397             | 18380            |
| (flat prior for intercept and regression coefficients) A7                     | 425             | 18369            |

<sup>a</sup>Abbreviations: pD=Effective number of parameters.

<sup>b</sup>Abbreviations: DIC=Deviance Information Criterion.

Table 3: Model A1 (independent Gaussian prior for ‘ $u$ ’) for estimated posterior odds ratios of patient characteristics associated with the intended adjuvant therapies, and relative weights between therapies.

| Factors                                    | N    | Median posterior odds ratios [95% CrI <sup>a</sup> ] |                     |                   |
|--------------------------------------------|------|------------------------------------------------------|---------------------|-------------------|
|                                            |      | Radiotherapy                                         | Chemotherapy        | Hormonal Therapy  |
| <b>Road travelling time (TRACT)</b>        |      |                                                      |                     |                   |
| < 1 hour                                   | 4514 | 1.00                                                 | 1.00                | 1.00              |
| 1– < 2 hours                               | 502  | 0.88 [0.55, 1.39]                                    | 0.75 [0.48, 1.19]   | 0.93 [0.67, 1.31] |
| 2– < 4 hours                               | 750  | 0.65 [0.42, 1.04]                                    | 0.92 [0.60, 1.44]   | 0.99 [0.71, 1.36] |
| 4– < 6 hours                               | 317  | 0.41 [0.24, 0.73]                                    | 0.44 [0.24, 0.80]   | 0.74 [0.49, 1.08] |
| 6 or more hours                            | 274  | 0.41 [0.23, 0.70]                                    | 0.60 [0.34, 1.07]   | 0.72 [0.49, 1.04] |
| <b>Socio-economic status (IRSAD)</b>       |      |                                                      |                     |                   |
| Quintile 1 Most disadvantaged              | 817  | 0.93 [0.64, 1.36]                                    | 0.72 [0.50, 1.04]   | 1.02 [0.78, 1.34] |
| Quintile 2                                 | 1458 | 0.80 [0.57, 1.10]                                    | 0.84 [0.60, 1.17]   | 0.91 [0.73, 1.16] |
| Quintile 3                                 | 1762 | 1.03 [0.76, 1.37]                                    | 0.90 [0.67, 1.19]   | 1.02 [0.82, 1.25] |
| Quintile 4                                 | 1539 | 0.91 [0.68, 1.22]                                    | 0.92 [0.68, 1.22]   | 1.04 [0.84, 1.28] |
| Quintile 5 Most advantaged                 | 781  | 1.00                                                 | 1.00                | 1.00              |
| <b>Age at diagnosis (years)</b>            |      |                                                      |                     |                   |
| 40-49                                      | 933  | 1.07 [0.85, 1.34]                                    | 1.85 [1.52, 2.25]   | 0.83 [0.71, 0.98] |
| 50-59                                      | 2064 | 1.00                                                 | 1.00                | 1.00              |
| 60-69                                      | 2074 | 0.86 [0.72, 1.03]                                    | 0.50 [0.42, 0.60]   | 1.20 [1.05, 1.38] |
| 70-89                                      | 1225 | 0.36 [0.29, 0.45]                                    | 0.12 [0.09, 0.16]   | 1.39 [1.19, 1.62] |
| <b>Indigenous Status</b>                   |      |                                                      |                     |                   |
| Non-Indigenous                             | 5467 | 1.00                                                 | 1.00                | 1.00              |
| Indigenous                                 | 63   | 1.67 [0.83, 3.49]                                    | 1.16 [0.60, 2.19]   | 1.33 [0.88, 2.05] |
| Indigenous Unknown                         | 766  | 0.87 [0.69, 1.09]                                    | 0.40 [0.30, 0.53]   | 1.06 [0.89, 1.26] |
| <b>Marital Status</b>                      |      |                                                      |                     |                   |
| Married                                    | 4150 | 1.00                                                 | 1.00                | 1.00              |
| Never Married                              | 305  | 0.78 [0.56, 1.08]                                    | 0.80 [0.57, 1.11]   | 0.85 [0.67, 1.08] |
| Widowed/Divorced/Separated                 | 1665 | 0.83 [0.71, 0.99]                                    | 0.95 [0.80, 1.14]   | 1.05 [0.93, 1.19] |
| Marital Unknown                            | 176  | 0.92 [0.59, 1.44]                                    | 1.07 [0.63, 1.78]   | 0.91 [0.67, 1.24] |
| <b>Tumour Stage</b>                        |      |                                                      |                     |                   |
| Localised (Stage I)                        | 4081 | 1.00                                                 | 1.00                | 1.00              |
| Advanced (Stage II, III, IV)               | 2139 | 2.43 [2.05, 2.91]                                    | 11.25 [9.67, 13.15] | 0.87 [0.77, 0.98] |
| Stage Unknown                              | 76   | 0.58 [0.31, 1.09]                                    | 2.83 [1.43, 5.42]   | 1.24 [0.84, 1.90] |
| <b>Occupation</b>                          |      |                                                      |                     |                   |
| Blue collar                                | 245  | 1.71 [1.18, 2.50]                                    | 1.03 [0.71, 1.48]   | 0.98 [0.76, 1.26] |
| White collar                               | 907  | 1.49 [1.19, 1.87]                                    | 1.19 [0.96, 1.47]   | 1.11 [0.94, 1.32] |
| Professional                               | 1061 | 1.49 [1.22, 1.85]                                    | 1.38 [1.13, 1.71]   | 1.09 [0.94, 1.28] |
| Not in the labour force                    | 2631 | 1.00                                                 | 1.00                | 1.00              |
| Unknown                                    | 1452 | 1.28 [1.06, 1.55]                                    | 1.04 [0.85, 1.28]   | 1.27 [1.10, 1.47] |
| <b>Invasive tumour type</b>                |      |                                                      |                     |                   |
| Invasive Ductal                            | 4074 | 1.00                                                 | 1.00                | 1.00              |
| Tubular                                    | 167  | 0.48 [0.33, 0.71]                                    | 0.27 [0.12, 0.55]   | 0.91 [0.68, 1.21] |
| Lobular Classical                          | 506  | 0.95 [0.75, 1.22]                                    | 0.73 [0.55, 0.95]   | 1.72 [1.40, 2.13] |
| Other                                      | 434  | 0.73 [0.56, 0.98]                                    | 0.77 [0.56, 1.04]   | 0.95 [0.77, 1.15] |
| Unknown                                    | 1115 | 0.81 [0.67, 0.98]                                    | 0.69 [0.57, 0.84]   | 0.70 [0.61, 0.81] |
| <b>First screen diagnosed</b>              |      |                                                      |                     |                   |
| Yes                                        | 1508 | 0.81 [0.68, 0.96]                                    | 0.78 [0.66, 0.93]   | 0.72 [0.63, 0.81] |
| No                                         | 4788 | 1.00                                                 | 1.00                | 1.00              |
| <b>Surgery</b>                             |      |                                                      |                     |                   |
| Breast-conserving surgery                  | 4255 | 1.00                                                 | 1.00                | 1.00              |
| Mastectomy                                 | 2009 | 0.03 [0.02, 0.03]                                    | 1.63 [1.40, 1.91]   | 0.86 [0.77, 0.97] |
| No surgery                                 | 15   | 0.15 [0.04, 0.44]                                    | 2.28 [0.74, 6.91]   | 0.86 [0.48, 1.49] |
| Unknown                                    | 17   | 0.18 [0.06, 0.48]                                    | 1.73 [0.66, 4.70]   | 1.11 [0.66, 1.90] |
| <b>Relative weight of shared component</b> |      |                                                      |                     |                   |
| Radiotherapy                               |      | 1.00                                                 | —                   | —                 |
| Chemotherapy                               |      | 0.58 [0.38, 0.83]                                    | 1.00                | —                 |
| Hormonal therapy                           |      | 0.89 [0.68, 1.17]                                    | 1.54 [1.09, 2.28]   | 1.00              |
| <b>PPC</b>                                 |      |                                                      | 0.9993              |                   |

<sup>a</sup>Abbreviations: CrI=Credible interval, N=Number of patients, TRACT=Travel to cancer treatment, IRSAD=Index of relative socio-economic advantage and disadvantage, PPC=Posterior predictive check.

Table 4: Model A2 (2nd shared component for radiotherapy and chemotherapy) for estimated posterior odds ratios of patient characteristics associated with the intended adjuvant therapies, and relative weights between therapies.

| Factors                                      | N    | Median posterior odds ratios [95% CrI <sup>a</sup> ] |                     |                   |
|----------------------------------------------|------|------------------------------------------------------|---------------------|-------------------|
|                                              |      | Radiotherapy                                         | Chemotherapy        | Hormonal Therapy  |
| <b>Road travelling time (TRACT)</b>          |      |                                                      |                     |                   |
| < 1 hour                                     | 4514 | 1.00                                                 | 1.00                | 1.00              |
| 1– < 2 hours                                 | 502  | 0.87 [0.55, 1.38]                                    | 0.76 [0.47, 1.21]   | 0.93 [0.67, 1.29] |
| 2– < 4 hours                                 | 750  | 0.65 [0.41, 1.04]                                    | 0.92 [0.59, 1.47]   | 0.98 [0.71, 1.34] |
| 4– < 6 hours                                 | 317  | 0.41 [0.23, 0.75]                                    | 0.44 [0.24, 0.81]   | 0.75 [0.50, 1.09] |
| 6 or more hours                              | 274  | 0.42 [0.24, 0.77]                                    | 0.60 [0.34, 1.11]   | 0.72 [0.48, 1.05] |
| <b>Socio-economic status (IRSAD)</b>         |      |                                                      |                     |                   |
| Quintile 1 Most disadvantaged                | 817  | 0.96 [0.65, 1.39]                                    | 0.72 [0.49, 1.06]   | 1.01 [0.78, 1.33] |
| Quintile 2                                   | 1458 | 0.81 [0.59, 1.13]                                    | 0.85 [0.62, 1.19]   | 0.92 [0.72, 1.16] |
| Quintile 3                                   | 1762 | 1.04 [0.76, 1.41]                                    | 0.91 [0.68, 1.22]   | 1.01 [0.82, 1.26] |
| Quintile 4                                   | 1539 | 0.93 [0.69, 1.26]                                    | 0.93 [0.70, 1.23]   | 1.03 [0.83, 1.27] |
| Quintile 5 Most advantaged                   | 781  | 1.00                                                 | 1.00                | 1.00              |
| <b>Age at diagnosis (years)</b>              |      |                                                      |                     |                   |
| 40-49                                        | 933  | 1.07 [0.85, 1.33]                                    | 1.84 [1.51, 2.24]   | 0.83 [0.71, 0.98] |
| 50-59                                        | 2064 | 1.00                                                 | 1.00                | 1.00              |
| 60-69                                        | 2074 | 0.86 [0.72, 1.03]                                    | 0.50 [0.42, 0.60]   | 1.20 [1.05, 1.37] |
| 70-89                                        | 1225 | 0.36 [0.29, 0.44]                                    | 0.12 [0.09, 0.16]   | 1.38 [1.18, 1.63] |
| <b>Indigenous Status</b>                     |      |                                                      |                     |                   |
| Non-Indigenous                               | 5467 | 1.00                                                 | 1.00                | 1.00              |
| Indigenous                                   | 63   | 1.68 [0.83, 3.55]                                    | 1.17 [0.60, 2.21]   | 1.33 [0.88, 2.04] |
| Indigenous Unknown                           | 766  | 0.86 [0.69, 1.08]                                    | 0.40 [0.31, 0.52]   | 1.06 [0.88, 1.26] |
| <b>Marital Status</b>                        |      |                                                      |                     |                   |
| Married                                      | 4150 | 1.00                                                 | 1.00                | 1.00              |
| Never Married                                | 305  | 0.77 [0.56, 1.09]                                    | 0.79 [0.56, 1.09]   | 0.85 [0.67, 1.08] |
| Widowed/Divorced/Separated                   | 1665 | 0.83 [0.71, 0.99]                                    | 0.95 [0.80, 1.14]   | 1.05 [0.93, 1.19] |
| Marital Unknown                              | 176  | 0.92 [0.59, 1.46]                                    | 1.06 [0.62, 1.75]   | 0.91 [0.67, 1.24] |
| <b>Tumour Stage</b>                          |      |                                                      |                     |                   |
| Localised (Stage I)                          | 4081 | 1.00                                                 | 1.00                | 1.00              |
| Advanced (Stage II, III, IV)                 | 2139 | 2.44 [2.04, 2.91]                                    | 11.23 [9.62, 13.13] | 0.87 [0.77, 0.97] |
| Stage Unknown                                | 76   | 0.59 [0.32, 1.09]                                    | 2.83 [1.43, 5.34]   | 1.24 [0.84, 1.88] |
| <b>Occupation</b>                            |      |                                                      |                     |                   |
| Blue collar                                  | 245  | 1.70 [1.18, 2.48]                                    | 1.03 [0.72, 1.47]   | 0.98 [0.76, 1.27] |
| White collar                                 | 907  | 1.49 [1.19, 1.88]                                    | 1.18 [0.95, 1.47]   | 1.11 [0.94, 1.30] |
| Professional                                 | 1061 | 1.50 [1.22, 1.86]                                    | 1.38 [1.12, 1.70]   | 1.09 [0.94, 1.28] |
| Not in the labour force                      | 2631 | 1.00                                                 | 1.00                | 1.00              |
| Unknown                                      | 1452 | 1.29 [1.06, 1.56]                                    | 1.04 [0.84, 1.28]   | 1.27 [1.09, 1.46] |
| <b>Invasive tumour type</b>                  |      |                                                      |                     |                   |
| Invasive Ductal                              | 4074 | 1.00                                                 | 1.00                | 1.00              |
| Tubular                                      | 167  | 0.48 [0.33, 0.71]                                    | 0.27 [0.12, 0.55]   | 0.91 [0.68, 1.22] |
| Lobular Classical                            | 506  | 0.96 [0.75, 1.23]                                    | 0.73 [0.56, 0.94]   | 1.72 [1.41, 2.12] |
| Other                                        | 434  | 0.74 [0.56, 0.97]                                    | 0.76 [0.56, 1.04]   | 0.94 [0.78, 1.16] |
| Unknown                                      | 1115 | 0.81 [0.67, 0.98]                                    | 0.69 [0.57, 0.84]   | 0.70 [0.61, 0.80] |
| <b>First screen diagnosed</b>                |      |                                                      |                     |                   |
| Yes                                          | 1508 | 0.81 [0.68, 0.96]                                    | 0.79 [0.67, 0.93]   | 0.72 [0.63, 0.81] |
| No                                           | 4788 | 1.00                                                 | 1.00                | 1.00              |
| <b>Surgery</b>                               |      |                                                      |                     |                   |
| Breast-conserving surgery                    | 4255 | 1.00                                                 | 1.00                | 1.00              |
| Mastectomy                                   | 2009 | 0.03 [0.02, 0.03]                                    | 1.63 [1.40, 1.91]   | 0.86 [0.77, 0.97] |
| No surgery                                   | 15   | 0.14 [0.04, 0.44]                                    | 2.26 [0.73, 6.76]   | 0.85 [0.49, 1.48] |
| Unknown                                      | 17   | 0.18 [0.07, 0.46]                                    | 1.73 [0.65, 4.73]   | 1.11 [0.65, 1.90] |
| <b>Relative weight of shared component 1</b> |      |                                                      |                     |                   |
| Radiotherapy                                 |      | 1.00                                                 | —                   | —                 |
| Chemotherapy                                 |      | 0.57 [0.35, 0.85]                                    | 1.00                | —                 |
| Hormonal therapy                             |      | 0.88 [0.68, 1.15]                                    | 1.54 [1.04, 2.52]   | 1.00              |
| <b>Relative weight of shared component 2</b> |      |                                                      |                     |                   |
| Chemotherapy                                 |      | 0.82 [0.21, 3.77]                                    | 1.00                | —                 |
| <b>PPC</b>                                   |      | 0.9989                                               |                     |                   |

<sup>a</sup>Abbreviations: CrI=Credible interval, N=Number of patients, TRACT=Travel to cancer treatment, IRSAD=Index of relative socio-economic advantage and disadvantage, PPC=Posterior predictive check.

Table 5: Model A3 (2nd shared component for radiotherapy and hormonal therapy) for estimated posterior odds ratios of patient characteristics associated with the intended adjuvant therapies, and relative weights between therapies.

| Factors                                      | N    | Median posterior odds ratios [95% CrI <sup>a</sup> ] |                     |                   |
|----------------------------------------------|------|------------------------------------------------------|---------------------|-------------------|
|                                              |      | Radiotherapy                                         | Chemotherapy        | Hormonal Therapy  |
| <b>Road travelling time (TRACT)</b>          |      |                                                      |                     |                   |
| < 1 hour                                     | 4514 | 1.00                                                 | 1.00                | 1.00              |
| 1– < 2 hours                                 | 502  | 0.86 [0.55, 1.37]                                    | 0.72 [0.45, 1.18]   | 0.94 [0.67, 1.31] |
| 2– < 4 hours                                 | 750  | 0.66 [0.41, 1.05]                                    | 0.88 [0.56, 1.43]   | 0.98 [0.71, 1.35] |
| 4– < 6 hours                                 | 317  | 0.41 [0.23, 0.74]                                    | 0.42 [0.23, 0.77]   | 0.74 [0.49, 1.11] |
| 6 or more hours                              | 274  | 0.41 [0.24, 0.73]                                    | 0.57 [0.31, 1.02]   | 0.72 [0.48, 1.06] |
| <b>Socio-economic status (IRSAD)</b>         |      |                                                      |                     |                   |
| Quintile 1 Most disadvantaged                | 817  | 0.97 [0.67, 1.40]                                    | 0.72 [0.50, 1.04]   | 1.01 [0.77, 1.33] |
| Quintile 2                                   | 1458 | 0.82 [0.59, 1.16]                                    | 0.85 [0.62, 1.18]   | 0.91 [0.72, 1.17] |
| Quintile 3                                   | 1762 | 1.05 [0.79, 1.43]                                    | 0.90 [0.68, 1.21]   | 1.01 [0.81, 1.26] |
| Quintile 4                                   | 1539 | 0.94 [0.70, 1.25]                                    | 0.92 [0.70, 1.21]   | 1.04 [0.84, 1.28] |
| Quintile 5 Most advantaged                   | 781  | 1.00                                                 | 1.00                | 1.00              |
| <b>Age at diagnosis (years)</b>              |      |                                                      |                     |                   |
| 40-49                                        | 933  | 1.07 [0.86, 1.36]                                    | 1.85 [1.51, 2.25]   | 0.83 [0.71, 0.98] |
| 50-59                                        | 2064 | 1.00                                                 | 1.00                | 1.00              |
| 60-69                                        | 2074 | 0.86 [0.72, 1.03]                                    | 0.50 [0.42, 0.60]   | 1.20 [1.05, 1.37] |
| 70-89                                        | 1225 | 0.36 [0.29, 0.45]                                    | 0.12 [0.09, 0.16]   | 1.39 [1.18, 1.63] |
| <b>Indigenous Status</b>                     |      |                                                      |                     |                   |
| Non-Indigenous                               | 5467 | 1.00                                                 | 1.00                | 1.00              |
| Indigenous                                   | 63   | 1.69 [0.84, 3.45]                                    | 1.14 [0.60, 2.11]   | 1.32 [0.88, 2.07] |
| Indigenous Unknown                           | 766  | 0.87 [0.70, 1.09]                                    | 0.40 [0.30, 0.53]   | 1.06 [0.89, 1.26] |
| <b>Marital Status</b>                        |      |                                                      |                     |                   |
| Married                                      | 4150 | 1.00                                                 | 1.00                | 1.00              |
| Never Married                                | 305  | 0.78 [0.56, 1.09]                                    | 0.79 [0.57, 1.10]   | 0.85 [0.68, 1.08] |
| Widowed/Divorced/Separated                   | 1665 | 0.83 [0.71, 0.98]                                    | 0.95 [0.80, 1.14]   | 1.05 [0.93, 1.19] |
| Marital Unknown                              | 176  | 0.91 [0.59, 1.45]                                    | 1.06 [0.62, 1.77]   | 0.91 [0.67, 1.24] |
| <b>Tumour Stage</b>                          |      |                                                      |                     |                   |
| Localised (Stage I)                          | 4081 | 1.00                                                 | 1.00                | 1.00              |
| Advanced (Stage II, III, IV)                 | 2139 | 2.44 [2.05, 2.90]                                    | 11.19 [9.62, 13.07] | 0.86 [0.77, 0.97] |
| Stage Unknown                                | 76   | 0.58 [0.32, 1.10]                                    | 2.87 [1.46, 5.44]   | 1.24 [0.83, 1.87] |
| <b>Occupation</b>                            |      |                                                      |                     |                   |
| Blue collar                                  | 245  | 1.71 [1.18, 2.49]                                    | 1.03 [0.73, 1.48]   | 0.98 [0.75, 1.26] |
| White collar                                 | 907  | 1.49 [1.19, 1.88]                                    | 1.18 [0.95, 1.46]   | 1.11 [0.95, 1.31] |
| Professional                                 | 1061 | 1.50 [1.22, 1.86]                                    | 1.38 [1.13, 1.70]   | 1.09 [0.93, 1.28] |
| Not in the labour force                      | 2631 | 1.00                                                 | 1.00                | 1.00              |
| Unknown                                      | 1452 | 1.29 [1.06, 1.56]                                    | 1.04 [0.85, 1.28]   | 1.27 [1.09, 1.46] |
| <b>Invasive tumour type</b>                  |      |                                                      |                     |                   |
| Invasive Ductal                              | 4074 | 1.00                                                 | 1.00                | 1.00              |
| Tubular                                      | 167  | 0.48 [0.33, 0.72]                                    | 0.27 [0.12, 0.55]   | 0.90 [0.68, 1.21] |
| Lobular Classical                            | 506  | 0.95 [0.75, 1.22]                                    | 0.73 [0.56, 0.94]   | 1.72 [1.39, 2.12] |
| Other                                        | 434  | 0.74 [0.56, 0.96]                                    | 0.77 [0.56, 1.02]   | 0.94 [0.77, 1.15] |
| Unknown                                      | 1115 | 0.81 [0.67, 0.98]                                    | 0.69 [0.57, 0.84]   | 0.70 [0.61, 0.81] |
| <b>First screen diagnosed</b>                |      |                                                      |                     |                   |
| Yes                                          | 1508 | 0.81 [0.68, 0.97]                                    | 0.79 [0.67, 0.93]   | 0.72 [0.63, 0.82] |
| No                                           | 4788 | 1.00                                                 | 1.00                | 1.00              |
| <b>Surgery</b>                               |      |                                                      |                     |                   |
| Breast-conserving surgery                    | 4255 | 1.00                                                 | 1.00                | 1.00              |
| Mastectomy                                   | 2009 | 0.03 [0.02, 0.03]                                    | 1.63 [1.39, 1.90]   | 0.86 [0.76, 0.97] |
| No surgery                                   | 15   | 0.15 [0.04, 0.45]                                    | 2.24 [0.76, 7.24]   | 0.86 [0.48, 1.47] |
| Unknown                                      | 17   | 0.18 [0.07, 0.48]                                    | 1.72 [0.65, 4.54]   | 1.11 [0.66, 1.89] |
| <b>Relative weight of shared component 1</b> |      |                                                      |                     |                   |
| Radiotherapy                                 |      | 1.00                                                 | —                   | —                 |
| Chemotherapy                                 |      | 0.74 [0.40, 1.71]                                    | 1.00                | —                 |
| Hormonal therapy                             |      | 0.87 [0.61, 1.26]                                    | 1.19 [0.54, 2.09]   | 1.00              |
| <b>Relative weight of shared component 2</b> |      |                                                      |                     |                   |
| Hormonal Therapy                             |      | 1.01 [0.32, 2.83]                                    | —                   | 1.00              |
| <b>PPC</b>                                   |      | 0.9990                                               |                     |                   |

<sup>a</sup>Abbreviations: CrI=Credible interval, N=Number of patients, TRACT=Travel to cancer treatment, IRSAD=Index of relative socio-economic advantage and disadvantage, PPC=Posterior predictive check.

Table 6: Model A4 (2nd shared component for chemotherapy and hormonal therapy) for estimated posterior odds ratios of patient characteristics associated with the intended adjuvant therapies, and relative weights between therapies.

| Factors                                      | N    | Median posterior odds ratios [95% CrI <sup>a</sup> ] |                     |                   |
|----------------------------------------------|------|------------------------------------------------------|---------------------|-------------------|
|                                              |      | Radiotherapy                                         | Chemotherapy        | Hormonal Therapy  |
| <b>Road travelling time (TRACT)</b>          |      |                                                      |                     |                   |
| < 1 hour                                     | 4514 | 1.00                                                 | 1.00                | 1.00              |
| 1– < 2 hours                                 | 502  | 0.86 [0.54, 1.39]                                    | 0.73 [0.46, 1.20]   | 0.94 [0.67, 1.32] |
| 2– < 4 hours                                 | 750  | 0.66 [0.41, 1.06]                                    | 0.89 [0.56, 1.44]   | 0.98 [0.71, 1.35] |
| 4– < 6 hours                                 | 317  | 0.42 [0.23, 0.77]                                    | 0.43 [0.23, 0.80]   | 0.74 [0.50, 1.07] |
| 6 or more hours                              | 274  | 0.43 [0.23, 0.76]                                    | 0.57 [0.33, 1.05]   | 0.71 [0.48, 1.03] |
| <b>Socio-economic status (IRSAD)</b>         |      |                                                      |                     |                   |
| Quintile 1 Most disadvantaged                | 817  | 0.97 [0.67, 1.40]                                    | 0.72 [0.49, 1.04]   | 1.01 [0.77, 1.30] |
| Quintile 2                                   | 1458 | 0.83 [0.60, 1.15]                                    | 0.85 [0.61, 1.15]   | 0.91 [0.72, 1.16] |
| Quintile 3                                   | 1762 | 1.06 [0.79, 1.43]                                    | 0.90 [0.67, 1.20]   | 1.01 [0.81, 1.25] |
| Quintile 4                                   | 1539 | 0.94 [0.70, 1.24]                                    | 0.92 [0.69, 1.21]   | 1.03 [0.84, 1.26] |
| Quintile 5 Most advantaged                   | 781  | 1.00                                                 | 1.00                | 1.00              |
| <b>Age at diagnosis (years)</b>              |      |                                                      |                     |                   |
| 40-49                                        | 933  | 1.07 [0.85, 1.33]                                    | 1.84 [1.51, 2.26]   | 0.83 [0.71, 0.98] |
| 50-59                                        | 2064 | 1.00                                                 | 1.00                | 1.00              |
| 60-69                                        | 2074 | 0.86 [0.72, 1.03]                                    | 0.50 [0.42, 0.61]   | 1.20 [1.05, 1.37] |
| 70-89                                        | 1225 | 0.36 [0.29, 0.45]                                    | 0.12 [0.09, 0.16]   | 1.38 [1.18, 1.63] |
| <b>Indigenous Status</b>                     |      |                                                      |                     |                   |
| Non-Indigenous                               | 5467 | 1.00                                                 | 1.00                | 1.00              |
| Indigenous                                   | 63   | 1.69 [0.80, 3.47]                                    | 1.15 [0.61, 2.15]   | 1.32 [0.87, 2.05] |
| Indigenous Unknown                           | 766  | 0.87 [0.69, 1.09]                                    | 0.40 [0.30, 0.53]   | 1.05 [0.89, 1.25] |
| <b>Marital Status</b>                        |      |                                                      |                     |                   |
| Married                                      | 4150 | 1.00                                                 | 1.00                | 1.00              |
| Never Married                                | 305  | 0.78 [0.56, 1.09]                                    | 0.79 [0.57, 1.11]   | 0.85 [0.67, 1.08] |
| Widowed/Divorced/Separated                   | 1665 | 0.83 [0.71, 0.98]                                    | 0.95 [0.80, 1.14]   | 1.05 [0.93, 1.19] |
| Marital Unknown                              | 176  | 0.92 [0.59, 1.43]                                    | 1.06 [0.62, 1.78]   | 0.91 [0.67, 1.24] |
| <b>Tumour Stage</b>                          |      |                                                      |                     |                   |
| Localised (Stage I)                          | 4081 | 1.00                                                 | 1.00                | 1.00              |
| Advanced (Stage II, III, IV)                 | 2139 | 2.43 [2.05, 2.90]                                    | 11.25 [9.60, 13.13] | 0.87 [0.77, 0.98] |
| Stage Unknown                                | 76   | 0.58 [0.32, 1.07]                                    | 2.84 [1.45, 5.36]   | 1.24 [0.83, 1.88] |
| <b>Occupation</b>                            |      |                                                      |                     |                   |
| Blue collar                                  | 245  | 1.70 [1.18, 2.50]                                    | 1.03 [0.71, 1.46]   | 0.98 [0.76, 1.27] |
| White collar                                 | 907  | 1.49 [1.19, 1.87]                                    | 1.18 [0.95, 1.47]   | 1.11 [0.94, 1.31] |
| Professional                                 | 1061 | 1.50 [1.21, 1.86]                                    | 1.39 [1.13, 1.70]   | 1.09 [0.94, 1.27] |
| Not in the labour force                      | 2631 | 1.00                                                 | 1.00                | 1.00              |
| Unknown                                      | 1452 | 1.29 [1.07, 1.55]                                    | 1.04 [0.85, 1.28]   | 1.27 [1.09, 1.47] |
| <b>Invasive tumour type</b>                  |      |                                                      |                     |                   |
| Invasive Ductal                              | 4074 | 1.00                                                 | 1.00                | 1.00              |
| Tubular                                      | 167  | 0.48 [0.33, 0.70]                                    | 0.27 [0.12, 0.55]   | 0.91 [0.66, 1.23] |
| Lobular Classical                            | 506  | 0.95 [0.74, 1.23]                                    | 0.73 [0.56, 0.94]   | 1.72 [1.41, 2.13] |
| Other                                        | 434  | 0.73 [0.56, 0.96]                                    | 0.76 [0.57, 1.03]   | 0.94 [0.77, 1.16] |
| Unknown                                      | 1115 | 0.81 [0.67, 0.98]                                    | 0.69 [0.57, 0.84]   | 0.70 [0.61, 0.80] |
| <b>First screen diagnosed</b>                |      |                                                      |                     |                   |
| Yes                                          | 1508 | 0.81 [0.68, 0.96]                                    | 0.79 [0.66, 0.93]   | 0.72 [0.63, 0.81] |
| No                                           | 4788 | 1.00                                                 | 1.00                | 1.00              |
| <b>Surgery</b>                               |      |                                                      |                     |                   |
| Breast-conserving surgery                    | 4255 | 1.00                                                 | 1.00                | 1.00              |
| Mastectomy                                   | 2009 | 0.03 [0.02, 0.03]                                    | 1.63 [1.39, 1.91]   | 0.86 [0.76, 0.97] |
| No surgery                                   | 15   | 0.15 [0.04, 0.43]                                    | 2.26 [0.76, 6.94]   | 0.86 [0.48, 1.46] |
| Unknown                                      | 17   | 0.18 [0.07, 0.47]                                    | 1.71 [0.63, 4.68]   | 1.10 [0.66, 1.92] |
| <b>Relative weight of shared component 1</b> |      |                                                      |                     |                   |
| Radiotherapy                                 |      | 1.00                                                 | —                   | —                 |
| Chemotherapy                                 |      | 0.54 [0.31, 0.82]                                    | 1.00                | —                 |
| Hormonal therapy                             |      | 0.85 [0.62, 1.14]                                    | 1.58 [1.02, 2.65]   | 1.00              |
| <b>Relative weight of shared component 2</b> |      |                                                      |                     |                   |
| Hormonal Therapy                             |      | —                                                    | 1.22 [0.28, 5.45]   | 1.00              |
| <b>PPC</b>                                   |      | 0.9992                                               |                     |                   |

<sup>a</sup>Abbreviations: CrI=Credible interval, N=Number of patients, TRACT=Travel to cancer treatment, IRSAD=Index of relative socio-economic advantage and disadvantage, PPC=Posterior predictive check.

Table 7: Model A5 (without spatially unstructured random effect ‘*u*’) for estimated posterior odds ratios of patient characteristics associated with the intended adjuvant therapies, and relative weights between therapies.

| Factors                                    | N    | Median posterior odds ratios [95% CrI <sup>a</sup> ] |                     |                   |
|--------------------------------------------|------|------------------------------------------------------|---------------------|-------------------|
|                                            |      | Radiotherapy                                         | Chemotherapy        | Hormonal Therapy  |
| <b>Road travelling time (TRACT)</b>        |      |                                                      |                     |                   |
| < 1 hour                                   | 4514 | 1.00                                                 | 1.00                | 1.00              |
| 1– < 2 hours                               | 502  | 0.91 [0.57, 1.44]                                    | 0.76 [0.48, 1.19]   | 0.94 [0.68, 1.30] |
| 2– < 4 hours                               | 750  | 0.67 [0.43, 1.09]                                    | 0.89 [0.57, 1.41]   | 0.96 [0.70, 1.33] |
| 4– < 6 hours                               | 317  | 0.44 [0.25, 0.77]                                    | 0.45 [0.25, 0.81]   | 0.75 [0.51, 1.08] |
| 6 or more hours                            | 274  | 0.46 [0.27, 0.81]                                    | 0.59 [0.34, 1.06]   | 0.72 [0.49, 1.03] |
| <b>Socio-economic status (IRSAD)</b>       |      |                                                      |                     |                   |
| Quintile 1 Most disadvantaged              | 817  | 0.97 [0.68, 1.38]                                    | 0.75 [0.52, 1.06]   | 1.01 [0.78, 1.30] |
| Quintile 2                                 | 1458 | 0.81 [0.60, 1.10]                                    | 0.88 [0.65, 1.20]   | 0.92 [0.73, 1.14] |
| Quintile 3                                 | 1762 | 1.04 [0.79, 1.40]                                    | 0.91 [0.70, 1.20]   | 1.00 [0.82, 1.22] |
| Quintile 4                                 | 1539 | 0.93 [0.71, 1.22]                                    | 0.93 [0.71, 1.22]   | 1.03 [0.85, 1.25] |
| Quintile 5 Most advantaged                 | 781  | 1.00                                                 | 1.00                | 1.00              |
| <b>Age at diagnosis (years)</b>            |      |                                                      |                     |                   |
| 40-49                                      | 933  | 1.07 [0.86, 1.34]                                    | 1.83 [1.49, 2.23]   | 0.84 [0.71, 0.98] |
| 50-59                                      | 2064 | 1.00                                                 | 1.00                | 1.00              |
| 60-69                                      | 2074 | 0.86 [0.72, 1.02]                                    | 0.50 [0.42, 0.60]   | 1.20 [1.05, 1.37] |
| 70-89                                      | 1225 | 0.37 [0.30, 0.45]                                    | 0.12 [0.09, 0.16]   | 1.38 [1.17, 1.62] |
| <b>Indigenous Status</b>                   |      |                                                      |                     |                   |
| Non-Indigenous                             | 5467 | 1.00                                                 | 1.00                | 1.00              |
| Indigenous                                 | 63   | 1.67 [0.82, 3.47]                                    | 1.18 [0.63, 2.20]   | 1.32 [0.87, 2.02] |
| Indigenous Unknown                         | 766  | 0.87 [0.70, 1.09]                                    | 0.40 [0.30, 0.53]   | 1.06 [0.89, 1.26] |
| <b>Marital Status</b>                      |      |                                                      |                     |                   |
| Married                                    | 4150 | 1.00                                                 | 1.00                | 1.00              |
| Never Married                              | 305  | 0.78 [0.57, 1.08]                                    | 0.79 [0.57, 1.08]   | 0.85 [0.67, 1.09] |
| Widowed/Divorced/Separated                 | 1665 | 0.83 [0.71, 0.98]                                    | 0.95 [0.80, 1.14]   | 1.04 [0.92, 1.18] |
| Marital Unknown                            | 176  | 0.91 [0.58, 1.43]                                    | 1.06 [0.62, 1.77]   | 0.91 [0.67, 1.24] |
| <b>Tumour Stage</b>                        |      |                                                      |                     |                   |
| Localised (Stage I)                        | 4081 | 1.00                                                 | 1.00                | 1.00              |
| Advanced (Stage II, III, IV)               | 2139 | 2.41 [2.03, 2.88]                                    | 10.98 [9.43, 12.83] | 0.87 [0.77, 0.97] |
| Stage Unknown                              | 76   | 0.59 [0.32, 1.08]                                    | 2.83 [1.40, 5.32]   | 1.22 [0.82, 1.82] |
| <b>Occupation</b>                          |      |                                                      |                     |                   |
| Blue collar                                | 245  | 1.70 [1.17, 2.47]                                    | 1.03 [0.71, 1.45]   | 0.98 [0.76, 1.27] |
| White collar                               | 907  | 1.49 [1.18, 1.85]                                    | 1.18 [0.95, 1.46]   | 1.11 [0.94, 1.30] |
| Professional                               | 1061 | 1.50 [1.22, 1.86]                                    | 1.38 [1.13, 1.70]   | 1.09 [0.93, 1.28] |
| Not in the labour force                    | 2631 | 1.00                                                 | 1.00                | 1.00              |
| Unknown                                    | 1452 | 1.29 [1.07, 1.55]                                    | 1.05 [0.85, 1.28]   | 1.26 [1.09, 1.46] |
| <b>Invasive tumour type</b>                |      |                                                      |                     |                   |
| Invasive Ductal                            | 4074 | 1.00                                                 | 1.00                | 1.00              |
| Tubular                                    | 167  | 0.49 [0.34, 0.71]                                    | 0.27 [0.12, 0.54]   | 0.91 [0.68, 1.22] |
| Lobular Classical                          | 506  | 0.95 [0.75, 1.22]                                    | 0.73 [0.56, 0.94]   | 1.71 [1.40, 2.11] |
| Other                                      | 434  | 0.74 [0.57, 0.97]                                    | 0.76 [0.57, 1.02]   | 0.95 [0.77, 1.16] |
| Unknown                                    | 1115 | 0.82 [0.67, 0.98]                                    | 0.69 [0.57, 0.84]   | 0.70 [0.61, 0.80] |
| <b>First screen diagnosed</b>              |      |                                                      |                     |                   |
| Yes                                        | 1508 | 0.81 [0.69, 0.96]                                    | 0.79 [0.67, 0.94]   | 0.72 [0.63, 0.82] |
| No                                         | 4788 | 1.00                                                 | 1.00                | 1.00              |
| <b>Surgery</b>                             |      |                                                      |                     |                   |
| Breast-conserving surgery                  | 4255 | 1.00                                                 | 1.00                | 1.00              |
| Mastectomy                                 | 2009 | 0.03 [0.02, 0.04]                                    | 1.63 [1.39, 1.91]   | 0.86 [0.77, 0.97] |
| No surgery                                 | 15   | 0.15 [0.04, 0.43]                                    | 2.23 [0.75, 6.71]   | 0.87 [0.49, 1.49] |
| Unknown                                    | 17   | 0.18 [0.07, 0.48]                                    | 1.65 [0.59, 4.51]   | 1.09 [0.65, 1.85] |
| <b>Relative weight of shared component</b> |      |                                                      |                     |                   |
| Radiotherapy                               |      | 1.00                                                 | —                   | —                 |
| Chemotherapy                               |      | 0.54 [0.33, 0.79]                                    | 1.00                | —                 |
| Hormonal therapy                           |      | 0.85 [0.65, 1.10]                                    | 1.57 [1.08, 2.53]   | 1.00              |
| <b>PPC</b>                                 |      |                                                      | 0.9992              |                   |

<sup>a</sup>Abbreviations: CrI=Credible interval, N=Number of patients, TRACT=Travel to cancer treatment, IRSAD=Index of relative socio-economic advantage and disadvantage, PPC=Posterior predictive check.

Table 8: Model A6 (without spatially structured random effect ‘s’) for estimated posterior odds ratios of patient characteristics associated with the intended adjuvant therapies, and relative weights between therapies.

| Factors                                    | N    | Median posterior odds ratios [95% CrI <sup>a</sup> ] |                     |                   |
|--------------------------------------------|------|------------------------------------------------------|---------------------|-------------------|
|                                            |      | Radiotherapy                                         | Chemotherapy        | Hormonal Therapy  |
| <b>Road travelling time (TRACT)</b>        |      |                                                      |                     |                   |
| < 1 hour                                   | 4514 | 1.00                                                 | 1.00                | 1.00              |
| 1– < 2 hours                               | 502  | 0.84 [0.55, 1.30]                                    | 0.57 [0.39, 0.85]   | 0.96 [0.68, 1.34] |
| 2– < 4 hours                               | 750  | 0.62 [0.43, 0.89]                                    | 0.74 [0.54, 1.01]   | 0.99 [0.73, 1.35] |
| 4– < 6 hours                               | 317  | 0.39 [0.23, 0.65]                                    | 0.35 [0.22, 0.56]   | 0.77 [0.51, 1.11] |
| 6 or more hours                            | 274  | 0.36 [0.23, 0.61]                                    | 0.46 [0.28, 0.72]   | 0.75 [0.51, 1.08] |
| <b>Socio-economic status (IRSAD)</b>       |      |                                                      |                     |                   |
| Quintile 1 Most disadvantaged              | 817  | 0.89 [0.62, 1.27]                                    | 0.67 [0.47, 0.95]   | 1.04 [0.80, 1.35] |
| Quintile 2                                 | 1458 | 0.76 [0.55, 1.04]                                    | 0.79 [0.58, 1.07]   | 0.95 [0.75, 1.20] |
| Quintile 3                                 | 1762 | 0.94 [0.72, 1.30]                                    | 0.83 [0.64, 1.09]   | 1.06 [0.85, 1.30] |
| Quintile 4                                 | 1539 | 0.88 [0.65, 1.17]                                    | 0.86 [0.66, 1.12]   | 1.07 [0.87, 1.32] |
| Quintile 5 Most advantaged                 | 781  | 1.00                                                 | 1.00                | 1.00              |
| <b>Age at diagnosis (years)</b>            |      |                                                      |                     |                   |
| 40-49                                      | 933  | 1.07 [0.85, 1.35]                                    | 1.85 [1.52, 2.25]   | 0.83 [0.71, 0.97] |
| 50-59                                      | 2064 | 1.00                                                 | 1.00                | 1.00              |
| 60-69                                      | 2074 | 0.86 [0.72, 1.02]                                    | 0.51 [0.42, 0.60]   | 1.20 [1.05, 1.37] |
| 70-89                                      | 1225 | 0.36 [0.29, 0.44]                                    | 0.13 [0.10, 0.17]   | 1.38 [1.18, 1.61] |
| <b>Indigenous Status</b>                   |      |                                                      |                     |                   |
| Non-Indigenous                             | 5467 | 1.00                                                 | 1.00                | 1.00              |
| Indigenous                                 | 63   | 1.66 [0.81, 3.43]                                    | 1.10 [0.58, 2.05]   | 1.35 [0.90, 2.09] |
| Indigenous Unknown                         | 766  | 0.86 [0.69, 1.08]                                    | 0.40 [0.30, 0.53]   | 1.06 [0.89, 1.26] |
| <b>Marital Status</b>                      |      |                                                      |                     |                   |
| Married                                    | 4150 | 1.00                                                 | 1.00                | 1.00              |
| Never Married                              | 305  | 0.79 [0.57, 1.10]                                    | 0.80 [0.57, 1.13]   | 0.85 [0.67, 1.07] |
| Widowed/Divorced/Separated                 | 1665 | 0.84 [0.71, 0.99]                                    | 0.96 [0.81, 1.14]   | 1.04 [0.92, 1.19] |
| Marital Unknown                            | 176  | 0.92 [0.59, 1.42]                                    | 1.06 [0.63, 1.75]   | 0.91 [0.67, 1.23] |
| <b>Tumour Stage</b>                        |      |                                                      |                     |                   |
| Localised (Stage I)                        | 4081 | 1.00                                                 | 1.00                | 1.00              |
| Advanced (Stage II, III, IV)               | 2139 | 2.43 [2.04, 2.90]                                    | 11.09 [9.48, 12.92] | 0.87 [0.77, 0.97] |
| Stage Unknown                              | 76   | 0.59 [0.32, 1.09]                                    | 2.75 [1.39, 5.16]   | 1.23 [0.84, 1.88] |
| <b>Occupation</b>                          |      |                                                      |                     |                   |
| Blue collar                                | 245  | 1.71 [1.19, 2.48]                                    | 1.03 [0.71, 1.47]   | 0.98 [0.76, 1.28] |
| White collar                               | 907  | 1.49 [1.19, 1.86]                                    | 1.20 [0.97, 1.48]   | 1.11 [0.95, 1.30] |
| Professional                               | 1061 | 1.48 [1.20, 1.84]                                    | 1.38 [1.13, 1.69]   | 1.10 [0.94, 1.28] |
| Not in the labour force                    | 2631 | 1.00                                                 | 1.00                | 1.00              |
| Unknown                                    | 1452 | 1.26 [1.04, 1.52]                                    | 1.05 [0.85, 1.28]   | 1.27 [1.10, 1.47] |
| <b>Invasive tumour type</b>                |      |                                                      |                     |                   |
| Invasive Ductal                            | 4074 | 1.00                                                 | 1.00                | 1.00              |
| Tubular                                    | 167  | 0.48 [0.33, 0.70]                                    | 0.27 [0.12, 0.55]   | 0.91 [0.68, 1.22] |
| Lobular Classical                          | 506  | 0.96 [0.74, 1.23]                                    | 0.72 [0.56, 0.94]   | 1.72 [1.42, 2.12] |
| Other                                      | 434  | 0.74 [0.57, 0.96]                                    | 0.78 [0.58, 1.04]   | 0.94 [0.77, 1.15] |
| Unknown                                    | 1115 | 0.81 [0.68, 0.98]                                    | 0.69 [0.57, 0.85]   | 0.70 [0.61, 0.81] |
| <b>First screen diagnosed</b>              |      |                                                      |                     |                   |
| Yes                                        | 1508 | 0.81 [0.69, 0.96]                                    | 0.79 [0.67, 0.93]   | 0.72 [0.63, 0.82] |
| No                                         | 4788 | 1.00                                                 | 1.00                | 1.00              |
| <b>Surgery</b>                             |      |                                                      |                     |                   |
| Breast-conserving surgery                  | 4255 | 1.00                                                 | 1.00                | 1.00              |
| Mastectomy                                 | 2009 | 0.03 [0.02, 0.03]                                    | 1.62 [1.38, 1.90]   | 0.87 [0.77, 0.98] |
| No surgery                                 | 15   | 0.14 [0.04, 0.42]                                    | 2.40 [0.78, 7.52]   | 0.84 [0.48, 1.41] |
| Unknown                                    | 17   | 0.18 [0.07, 0.48]                                    | 1.69 [0.64, 4.56]   | 1.11 [0.66, 1.91] |
| <b>Relative weight of shared component</b> |      |                                                      |                     |                   |
| Radiotherapy                               |      | 1.00                                                 | —                   | —                 |
| Chemotherapy                               |      | 0.44 [0.28, 0.64]                                    | 1.00                | —                 |
| Hormonal therapy                           |      | 0.98 [0.80, 1.22]                                    | 2.25 [1.55, 3.48]   | 1.00              |
| <b>PPC</b>                                 |      |                                                      | 0.9990              |                   |

<sup>a</sup>Abbreviations: CrI=Credible interval, N=Number of patients, TRACT=Travel to cancer treatment, IRSAD=Index of relative socio-economic advantage and disadvantage, PPC=Posterior predictive check.

Table 9: Model A7 (flat priors for intercept and regression coefficients) for estimated posterior odds ratios of patient characteristics associated with the intended adjuvant therapies, and relative weights between therapies.

| Factors                                    | N    | Median posterior odds ratios [95% CrI <sup>a</sup> ] |                     |                   |
|--------------------------------------------|------|------------------------------------------------------|---------------------|-------------------|
|                                            |      | Radiotherapy                                         | Chemotherapy        | Hormonal Therapy  |
| <b>Road travelling time (TRACT)</b>        |      |                                                      |                     |                   |
| < 1 hour                                   | 4514 | 1.00                                                 | 1.00                | 1.00              |
| 1– < 2 hours                               | 502  | 0.60 [0.36, 1.01]                                    | 0.60 [0.36, 1.01]   | 0.64 [0.40, 1.00] |
| 2– < 4 hours                               | 750  | 0.37 [0.21, 0.65]                                    | 0.64 [0.39, 1.12]   | 0.55 [0.32, 0.92] |
| 4– < 6 hours                               | 317  | 0.19 [0.10, 0.38]                                    | 0.26 [0.13, 0.53]   | 0.33 [0.18, 0.64] |
| 6 or more hours                            | 274  | 0.20 [0.11, 0.40]                                    | 0.38 [0.20, 0.76]   | 0.33 [0.18, 0.64] |
| <b>Socio-economic status (IRSAD)</b>       |      |                                                      |                     |                   |
| Quintile 1 Most disadvantaged              | 817  | 0.97 [0.66, 1.41]                                    | 0.72 [0.49, 1.06]   | 1.04 [0.76, 1.42] |
| Quintile 2                                 | 1458 | 0.80 [0.57, 1.10]                                    | 0.84 [0.60, 1.18]   | 0.90 [0.69, 1.19] |
| Quintile 3                                 | 1762 | 1.02 [0.75, 1.38]                                    | 0.89 [0.66, 1.20]   | 1.00 [0.78, 1.28] |
| Quintile 4                                 | 1539 | 0.91 [0.67, 1.21]                                    | 0.91 [0.68, 1.22]   | 1.02 [0.81, 1.29] |
| Quintile 5 Most advantaged                 | 781  | 1.00                                                 | 1.00                | 1.00              |
| <b>Age at diagnosis (years)</b>            |      |                                                      |                     |                   |
| 40-49                                      | 933  | 1.07 [0.85, 1.35]                                    | 1.85 [1.51, 2.27]   | 0.83 [0.70, 0.98] |
| 50-59                                      | 2064 | 1.00                                                 | 1.00                | 1.00              |
| 60-69                                      | 2074 | 0.85 [0.71, 1.02]                                    | 0.49 [0.41, 0.59]   | 1.22 [1.06, 1.40] |
| 70-89                                      | 1225 | 0.35 [0.28, 0.43]                                    | 0.11 [0.09, 0.15]   | 1.43 [1.21, 1.69] |
| <b>Indigenous Status</b>                   |      |                                                      |                     |                   |
| Non-Indigenous                             | 5467 | 1.00                                                 | 1.00                | 1.00              |
| Indigenous                                 | 63   | 1.86 [0.86, 4.17]                                    | 1.19 [0.58, 2.38]   | 1.72 [0.96, 3.16] |
| Indigenous Unknown                         | 766  | 0.86 [0.69, 1.08]                                    | 0.38 [0.29, 0.51]   | 1.07 [0.89, 1.28] |
| <b>Marital Status</b>                      |      |                                                      |                     |                   |
| Married                                    | 4150 | 1.00                                                 | 1.00                | 1.00              |
| Never Married                              | 305  | 0.77 [0.55, 1.10]                                    | 0.77 [0.55, 1.08]   | 0.83 [0.64, 1.07] |
| Widowed/Divorced/Separated                 | 1665 | 0.83 [0.71, 0.98]                                    | 0.96 [0.80, 1.14]   | 1.04 [0.91, 1.18] |
| Marital Unknown                            | 176  | 0.92 [0.57, 1.48]                                    | 1.06 [0.59, 1.83]   | 0.86 [0.60, 1.26] |
| <b>Tumour Stage</b>                        |      |                                                      |                     |                   |
| Localised (Stage I)                        | 4081 | 1.00                                                 | 1.00                | 1.00              |
| Advanced (Stage II, III, IV)               | 2139 | 2.49 [2.09, 2.98]                                    | 11.64 [9.98, 13.61] | 0.86 [0.77, 0.97] |
| Stage Unknown                              | 76   | 0.67 [0.33, 1.33]                                    | 3.18 [1.49, 6.55]   | 1.70 [0.96, 3.02] |
| <b>Occupation</b>                          |      |                                                      |                     |                   |
| Blue collar                                | 245  | 1.75 [1.20, 2.59]                                    | 1.04 [0.72, 1.51]   | 0.99 [0.74, 1.31] |
| White collar                               | 907  | 1.50 [1.19, 1.89]                                    | 1.18 [0.95, 1.47]   | 1.14 [0.95, 1.35] |
| Professional                               | 1061 | 1.51 [1.22, 1.87]                                    | 1.39 [1.12, 1.73]   | 1.12 [0.94, 1.31] |
| Not in the labour force                    | 2631 | 1.00                                                 | 1.00                | 1.00              |
| Unknown                                    | 1452 | 1.30 [1.07, 1.58]                                    | 1.05 [0.85, 1.29]   | 1.29 [1.11, 1.50] |
| <b>Invasive tumour type</b>                |      |                                                      |                     |                   |
| Invasive Ductal                            | 4074 | 1.00                                                 | 1.00                | 1.00              |
| Tubular                                    | 167  | 0.47 [0.31, 0.69]                                    | 0.18 [0.06, 0.43]   | 0.88 [0.64, 1.25] |
| Lobular Classical                          | 506  | 0.95 [0.74, 1.25]                                    | 0.71 [0.54, 0.93]   | 1.84 [1.48, 2.28] |
| Other                                      | 434  | 0.72 [0.55, 0.97]                                    | 0.75 [0.56, 1.01]   | 0.94 [0.75, 1.15] |
| Unknown                                    | 1115 | 0.81 [0.67, 0.98]                                    | 0.68 [0.55, 0.82]   | 0.68 [0.59, 0.79] |
| <b>First screen diagnosed</b>              |      |                                                      |                     |                   |
| Yes                                        | 1508 | 0.81 [0.69, 0.96]                                    | 0.78 [0.65, 0.93]   | 0.71 [0.62, 0.81] |
| No                                         | 4788 | 1.00                                                 | 1.00                | 1.00              |
| <b>Surgery</b>                             |      |                                                      |                     |                   |
| Breast-conserving surgery                  | 4255 | 1.00                                                 | 1.00                | 1.00              |
| Mastectomy                                 | 2009 | 0.03 [0.02, 0.03]                                    | 1.66 [1.41, 1.94]   | 0.86 [0.76, 0.97] |
| No surgery                                 | 15   | 0.04 [0.01, 0.19]                                    | 3.61 [0.85, 14.65]  | 0.41 [0.12, 1.41] |
| Unknown                                    | 17   | 0.10 [0.03, 0.29]                                    | 2.38 [0.69, 7.88]   | 1.51 [0.52, 4.65] |
| <b>Relative weight of shared component</b> |      |                                                      |                     |                   |
| Radiotherapy                               |      | 1.00                                                 | —                   | —                 |
| Chemotherapy                               |      | 0.57 [0.36, 0.86]                                    | 1.00                | —                 |
| Hormonal therapy                           |      | 0.87 [0.63, 1.13]                                    | 1.51 [0.97, 2.39]   | 1.00              |
| <b>PPC</b>                                 |      |                                                      | 0.9991              |                   |

<sup>a</sup>Abbreviations: CrI=Credible interval, N=Number of patients, TRACT=Travel to cancer treatment, IRSAD=Index of relative socio-economic advantage and disadvantage, PPC=Posterior predictive check.
